# Supplementary material for: Mannose 6 phosphorylation of lysosomal enzymes controls B cell functions
Source: PubMed Central journal article supplement — J Cell Biol. 2015 Jan 19;208(2):171–80. doi: 10.1083/jcb.201407077 (PMC4298682; doi:10.1083/jcb.201407077), 2015-01-19
Supplement: supp_jcb.201407077_JCB_201407077_sm.pdf [file supp_jcb.201407077_JCB_201407077_sm.pdf]

Otomo et al., <http://www.jcb.org/cgi/content/full/jcb.201407077/DC1>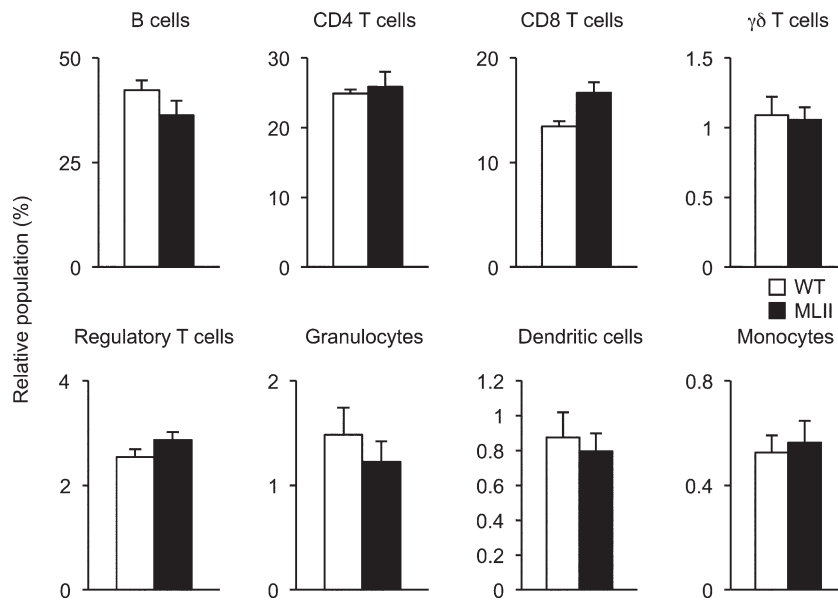

Figure S1. **Composition of immune cells in the spleen of MLII mice.** Immune cell populations in spleen from WT and MLII mice were analyzed by flow cytometry. Regulatory T cells are defined as CD4<sup>+</sup>Foxp3<sup>+</sup> cells, granulocytes as CD11b<sup>+</sup>Gr1<sup>high</sup> cells, DCs as CD11c<sup>+</sup>MHC II<sup>+</sup> cells, and monocytes as CD11b<sup>+</sup>Ly6C<sup>high</sup>Gr1<sup>low</sup> cells. The data are expressed as the mean and SEM ( $n = 6-11$ , except regulatory T cells [ $n = 3$ ]).

Table S1. **Flow cytometric analysis of lymphocytes in MLII patients**

| Lymphocyte subset <sup>a</sup>     | Patient 3 | Patient 4 | Reference range <sup>b</sup> ( $n = 33$ ) |
|------------------------------------|-----------|-----------|-------------------------------------------|
| B cells                            | 9         | 9         | 14-44                                     |
| T cells                            | 82        | 83        | 43-76                                     |
| CD4/CD8 ratio                      | 2.2       | 0.9       | 0.9-2.9                                   |
| NK cells                           | 6         | 7         | 4-23                                      |
| B cell subset <sup>c</sup>         | Patient 3 | Patient 4 | Reference range <sup>d</sup> ( $n = 19$ ) |
| CD27 <sup>-</sup> IgD <sup>+</sup> | 93.0      | ND        | 76.3-84.9                                 |
| CD27 <sup>+</sup> IgD <sup>+</sup> | 3.7       | ND        | 4.1-9.0                                   |
| CD27 <sup>+</sup> IgD <sup>-</sup> | 1.6       | ND        | 3.3-7.4                                   |
| CD27 <sup>-</sup> IgD <sup>-</sup> | 1.6       | ND        | 3.4-6.1                                   |

<sup>a</sup>Blood samples from MLII patients 3 and 4 analyzed by flow cytometry. The values represent percentage among lymphocytes with the exception of the ratio.

<sup>b</sup>Comans-Bitter et al., 1997.

<sup>c</sup>B cell subset analysis from MLII patient 3 revealed an enlarged naive CD27<sup>-</sup>IgD<sup>+</sup> population and reduced IgD<sup>-</sup> populations compared to the age-matched reference range, indicating impaired immunoglobulin class switching. The values represent percentage among B cells.

<sup>d</sup>Morbach et al., 2010.

Table S2. Immune status of MLII patients

| Patient | GNPTAB mutations                                                  | Vaccination (response <sup>a</sup> )                                                                   | IVIg <sup>b</sup> | Ig levels (year/month) <sup>c,d</sup>                                                        |
|---------|-------------------------------------------------------------------|--------------------------------------------------------------------------------------------------------|-------------------|----------------------------------------------------------------------------------------------|
| 1       | c.2089_2090insC (p.Leu697ProfsX51)<br>c.3565C>T (p.Arg1189X)      | Measles (-)                                                                                            | +                 | IgG 733, <u>IgA 25</u> , <u>IgM 23</u> (1/8)<br>IgG 742, <u>IgA 28</u> , <u>IgM 18</u> (2/2) |
| 2       | c.3565C>T (p.Arg1189X)<br>c.3565C>T (p.Arg1189X)                  | Measles (+), Mumps (+), Rubella (-), Varicella (-)                                                     | +                 | IgG 790, IgA 68, <u>IgM 28</u> (1/5)                                                         |
| 3       | c.344_345delCA (p.Thr115AsnfsX5)<br>c.1022delC (p.Pro341HisfsX18) | Diphtheria (-), Tetanus (+), Pertussis (-),<br>Measles (-), Mumps (+), Rubella (-), Varicella (-)      | -                 | <u>IgG 571</u> , IgA 37, <u>IgM &lt; 25</u> (2/5)                                            |
| 4       | c.242G>T (P.Trp81Leu)<br>c.242G>T (P.Trp81Leu)                    | Diphtheria (-), Tetanus (-), Pertussis (-),<br>Measles (-), Mumps (-), Rubella (+),<br>Hepatitis B (-) | -                 | <u>IgG 540</u> , IgA 81, <u>IgM 32</u> (4/3)                                                 |

<sup>a</sup>Antibody response: +, positive; -, negative/insufficient.

<sup>b</sup>IVIg, intravenous injections of immunoglobulins.

<sup>c</sup>Basal IgG, IgA, and IgM concentrations in serum (mg/dl) and the age of patients at the time of measurement: Values lower than age-matched controls are underlined.

<sup>d</sup>Stiehm and Fudenberg, 1966.

## References

- Comans-Bitter, W.M., R. de Groot, R. van den Beemd, H.J. Neijens, W.C. Hop, K. Groeneveld, H. Hooijkaas, and J.J. van Dongen. 1997. Immunophenotyping of blood lymphocytes in childhood. Reference values for lymphocyte subpopulations. *J. Pediatr.* 130:388–393. [http://dx.doi.org/10.1016/S0022-3476\(97\)70200-2](http://dx.doi.org/10.1016/S0022-3476(97)70200-2)
- Morbach, H., E.M. Eichhorn, J.G. Liese, and H.J. Girschick. 2010. Reference values for B cell subpopulations from infancy to adulthood. *Clin. Exp. Immunol.* 162:271–279. <http://dx.doi.org/10.1111/j.1365-2249.2010.04206.x>
- Stiehm, E.R., and H.H. Fudenberg. 1966. Serum levels of immune globulins in health and disease: a survey. *Pediatrics.* 37:715–727.
